# Supplementary material for: CRIPTO and its signaling partner GRP78 drive the metastatic phenotype in human osteotropic prostate cancer
Source: PubMed Central journal article supplement — Oncogene. 2017 Apr 10;36(33):4739–49. doi: 10.1038/onc.2017.87 (PMC5562855; doi:10.1038/onc.2017.87), 2017-04-10
Supplement: onc201787x2.pdf [file onc201787x2.pdf]

| <b>Supplementary Table I. Real time-qPCR primers</b> |                         |                          |
|------------------------------------------------------|-------------------------|--------------------------|
| <b>GENE</b>                                          | <b>Forward Primer</b>   | <b>Reverse Primer</b>    |
| TDGF1_Human                                          | CACGATGTGCGCAAAGAGAA    | TGACCGTGCCAGCATTTACA     |
| TDGF1_Mouse                                          | CGCCAGCTAGCATAAAAAGTG   | CCCAAGAAGTGTTCCCTGTG     |
| GRP78                                                | GAACGTCTGATTGGCGATGC    | TCAACCACCTTGAACGGCAA     |
| CDH1                                                 | TTGACGCCGAGAGCTACAC     | GACCGGTGCAATCTTCAA       |
| CDH2                                                 | CAGACCGACCCAAACAGCAAC   | GCAGCAACAGTAAGGACAAACATC |
| VIM                                                  | CCAAACTTTTCCTCCCTGAACC  | CGTGATGCTGAGAAGTTTCGTTGA |
| ZEB1                                                 | CCATATTGAGCTGTTGCCGC    | GCCCTTCCTTCCTGTGTCA      |
| ZEB2                                                 | GACCTGGCAGTGAAGGAAAA    | GGCACTTGCAGAAACACAGA     |
| SNAIL1                                               | ACCACTATGCCGCGCTCTT     | GGTCGTAGGGCTGCTGGAA      |
| SNAIL2                                               | TGTGTGGACTACCGCTGC      | TCCGGAAGAGGAGAGAGG       |
| TWIST                                                | GCCGGAGACCTAGATGTCATT   | TTTTAAAAGTGCGCCCCACG     |
| GAPDH                                                | GACAGTCAGCCGCATCTTC     | GCAACAATATCCACTTTACCAGAG |
| HPRT                                                 | AGACTTTGCTTTCCTTGGTCAGG | GTCTGGCTTATATCCAACACTTCG |
| ACTIN                                                | GAAACTACCTTCAACTCCATC   | CTAGAAGCATTTGCGGTGGAC    |
